# Supplementary material for: Clinical Practice Patterns in Tic Disorders Among Movement Disorder Society Members
Source: PubMed Central journal article supplement (PMC8555622; doi:10.5334/tohm.656), 2021-10-28
Supplement: tohm-11-1-656-s2.pdf [file tohm-11-1-656-s2.pdf]

## Supplementary material 2. Additional Figures and Tables

**Supplementary Table 1.** List of participant countries and number of respondents from each country.

| Country        | Number of respondents |
|----------------|-----------------------|
| United States  | 38                    |
| Brazil         | 24                    |
| India          | 22                    |
| Italy          | 22                    |
| Argentina      | 17                    |
| Slovakia       | 16                    |
| Germany        | 13                    |
| Mexico         | 10                    |
| Russia         | 10                    |
| United Kingdom | 10                    |
| Canada         | 9                     |
| Egypt          | 8                     |
| Nigeria        | 8                     |
| Spain          | 8                     |
| Ukraine        | 8                     |
| Romania        | 7                     |
| Indonesia      | 6                     |
| South Korea    | 6                     |
| Peru           | 5                     |
| Colombia       | 4                     |
| Croatia        | 4                     |
| France         | 4                     |
| Japan          | 4                     |
| Poland         | 4                     |
| Bangladesh     | 3                     |
| Chile          | 3                     |
| China          | 3                     |
| Greece         | 3                     |
| Israel         | 3                     |
| Philippines    | 3                     |
| Serbia         | 3                     |
| Thailand       | 3                     |
| Turkey         | 3                     |
| Australia      | 2                     |
| Bulgaria       | 2                     |
| Cuba           | 2                     |
| Denmark        | 2                     |
| Ethiopia       | 2                     |
| Malaysia       | 2                     |
| Mongolia       | 2                     |
| Switzerland    | 2                     |
| Vietnam        | 2                     |

|                                  |   |
|----------------------------------|---|
| Algeria                          | 1 |
| Armenia                          | 1 |
| Austria                          | 1 |
| Belgium                          | 1 |
| Bosnia and Herzegovina           | 1 |
| Cameroon                         | 1 |
| Democratic Republic of the Congo | 1 |
| Equador                          | 1 |
| Ghana                            | 1 |
| Honduras                         | 1 |
| Hungary                          | 1 |
| Iraq                             | 1 |
| Ireland                          | 1 |
| Kuwait                           | 1 |
| Kyrgyzstan                       | 1 |
| Laos                             | 1 |
| Mali                             | 1 |
| Myanmar                          | 1 |
| Netherlands                      | 1 |
| Norway                           | 1 |
| Pakistan                         | 1 |
| Portugal                         | 1 |
| Reunion                          | 1 |
| Saudi Arabia                     | 1 |
| Slovenia                         | 1 |
| South Africa                     | 1 |
| Sri Lanka                        | 1 |
| Taiwan                           | 1 |
| Tanzania                         | 1 |
| United Arab Emirates             | 1 |
| Uruguay                          | 1 |
| Not provided                     | 7 |

**Supplementary Table 2.** Frequency and type of implemented scales for assessing tics and comorbidities in clinical practice. N refers to number of respondents. \*only validated scales are listed.

| Domain | Scale                                                 | N   |
|--------|-------------------------------------------------------|-----|
| Tics   | Yale Global Tic Severity Scale (YGTSS)                | 123 |
|        | Tourette Syndrome – Global Clinical Impression        | 70  |
|        | Modified Rush Video Protocol                          | 20  |
|        | Motor tic, Obsessions and compulsions, Vocal tic      | 5   |
|        | Evaluation Survey (MOVES)                             |     |
|        | Others                                                | 5*  |
|        |                                                       |     |
|        | Self report scale                                     |     |
|        | Skala für abnormale unwillkürliche Bewegungen (SKAUB) |     |
|        | Quality of life (QoL)                                 |     |
|        | Shapiro TS Severity Scale                             |     |

|            |                                                                                                                   |     |
|------------|-------------------------------------------------------------------------------------------------------------------|-----|
| OCD        | Yale-Brown Obsessive-Compulsive Scale (Y-BOCS)                                                                    | 77  |
|            | Children's Yale-Brown Obsessive-Compulsive Scale (CY-BOCS)                                                        | 28  |
|            | Others                                                                                                            | 16* |
|            | Dimensional Obsessive- Compulsive Scale                                                                           |     |
|            | Florida Obsessive-Compulsive Inventory (FOCI)<br>Padua Inventory                                                  |     |
| ADHD       | ADHD Self Report Scale (ASRS)                                                                                     | 59  |
|            | Conners' Adult ADHD Rating Scale                                                                                  | 11  |
|            | Conners' ADHD Rating Scale                                                                                        | 23  |
|            | Swanson, Nolan, and Pelham Rating Scale (SNAP-IV)                                                                 | 16  |
|            | Vanderbilt ADHD Diagnostic Rating Scale (VADRS)                                                                   | 12  |
|            | Others                                                                                                            | 18* |
|            | Barkley Adult ADHD Rating Scale (BAARS)                                                                           |     |
| Anxiety    | Hospital Anxiety and Depression Scale (HADS)                                                                      | 56  |
|            | Hamilton Anxiety Rating Scale (HAM-A)                                                                             | 54  |
|            | Beck Anxiety Inventory (BAI)                                                                                      | 56  |
|            | Screen for Child Anxiety Related Disorders (SCARED)                                                               | 5   |
|            | Multidimensional Anxiety Scale for Children                                                                       | 6   |
|            | Others                                                                                                            | 15* |
|            | Zung Self-Rating Anxiety Scale                                                                                    |     |
|            | Generalized Anxiety Disorders (GAD)-7<br>Social Phobia Inventory (SPIN)<br>Spence Children's Anxiety Scale (SCAS) |     |
| Depression | Beck Depression Inventory (BDI)                                                                                   | 113 |
|            | Hamilton Depression Rating Scale (HAM-D)                                                                          | 76  |
|            | Children's Depression Inventory (CDI)                                                                             | 10  |
|            | Others                                                                                                            | 13* |
|            | Patient Health Questionnaire (PHQ)-9                                                                              |     |
|            | Zung Self Rating Depression Scale<br>Quick Inventory of Depressive Symptomatology (QIDS)                          |     |

**Supplementary Table 3.** Ranked five most used medication in comparison between the Americas and Europe in adults.

| Top adult medication in the Americas | N* | Top adult medication in Europe | N* |
|--------------------------------------|----|--------------------------------|----|
| Clonidine                            | 53 | Aripiprazole                   | 48 |
| Aripiprazole                         | 51 | Risperidone                    | 39 |
| Risperidone                          | 51 | Quetiapine                     | 37 |
| Tetrabenazine                        | 47 | Botulinum toxin                | 36 |
| Topiramate                           | 39 | Tetrabenazine                  | 33 |

\* = Total number of responses for adults =82, for children/adolescents =80

**Supplementary Table 4.** Ranked five most used medication in comparison between the Americas and Europe in children (5<sup>th</sup> place is shared in both the Americas and Europe).

| Top child medication in the Americas | N* | Top child medication in Europe | N* |
|--------------------------------------|----|--------------------------------|----|
|--------------------------------------|----|--------------------------------|----|

|               |    | Europe       |    |
|---------------|----|--------------|----|
| Clonidine     | 49 | Aripiprazole | 42 |
| Risperidone   | 48 | Clonidine    | 34 |
| Aripiprazole  | 45 | Risperidone  | 34 |
| Topiramate    | 36 | Tiapride     | 25 |
| Tetrabenazine | 31 | Topiramate   | 22 |
| Guanfacine    | 31 | Haloperidol  | 22 |

\* = Total number of responses for adults =70, for children/adolescents =67

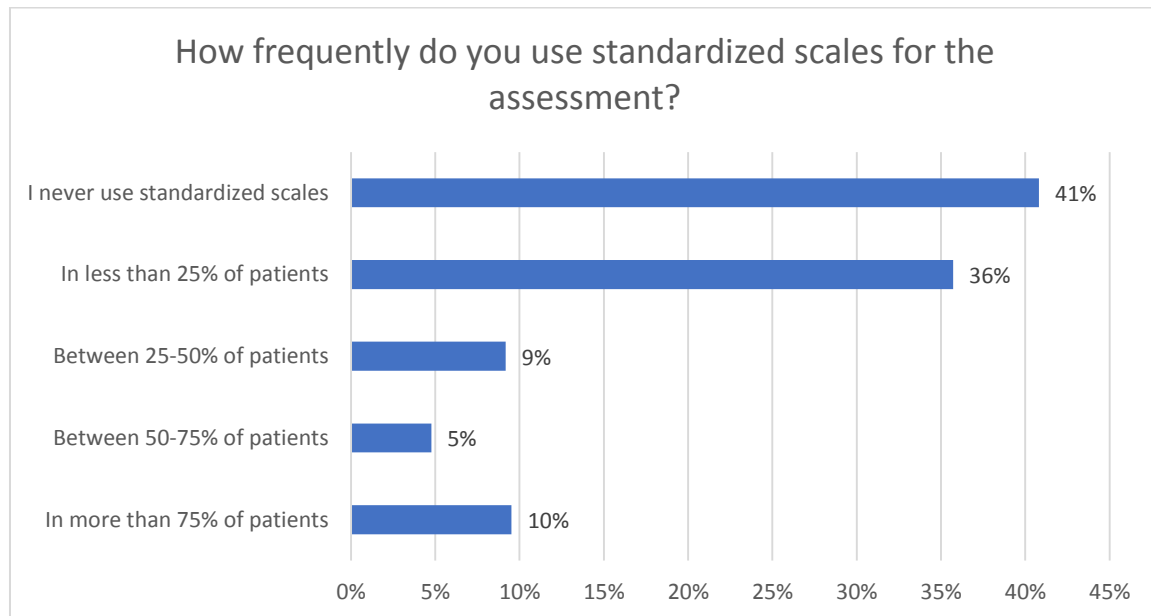

**Supplementary Figure 1.** Use of standardized tic severity scales in clinical practice. Total number of respondents: n= 294.

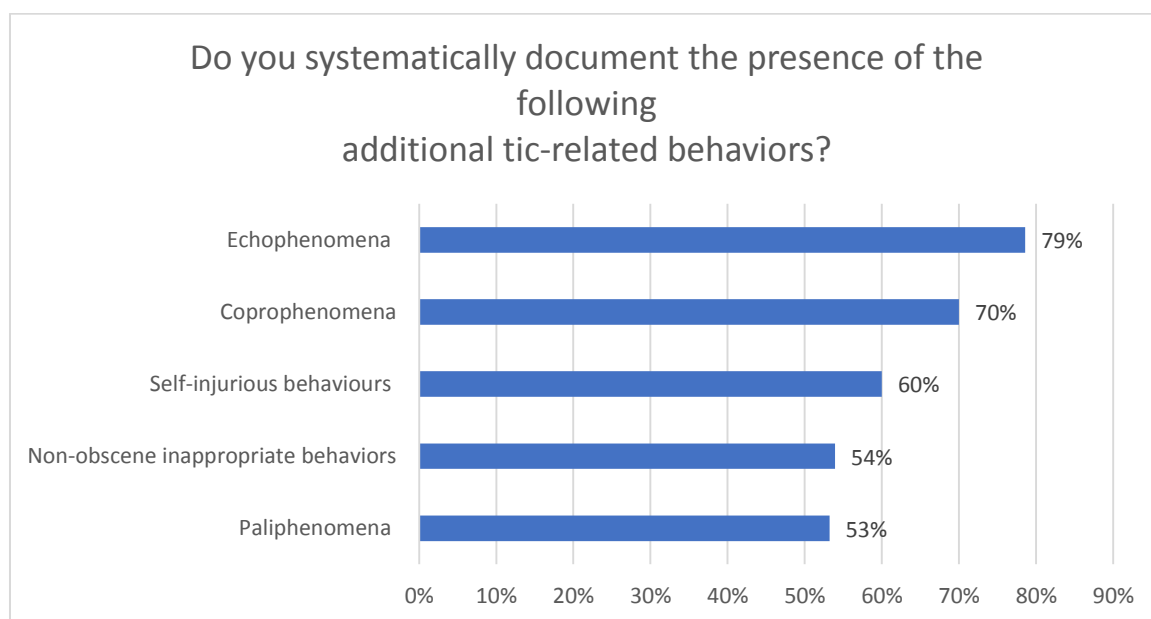

**Supplementary Figure 2.** Systematical documentation of the presence of additional tic-related behaviors in clinical practice. Multiple choices per participant were possible. Total number of respondents: n=280.

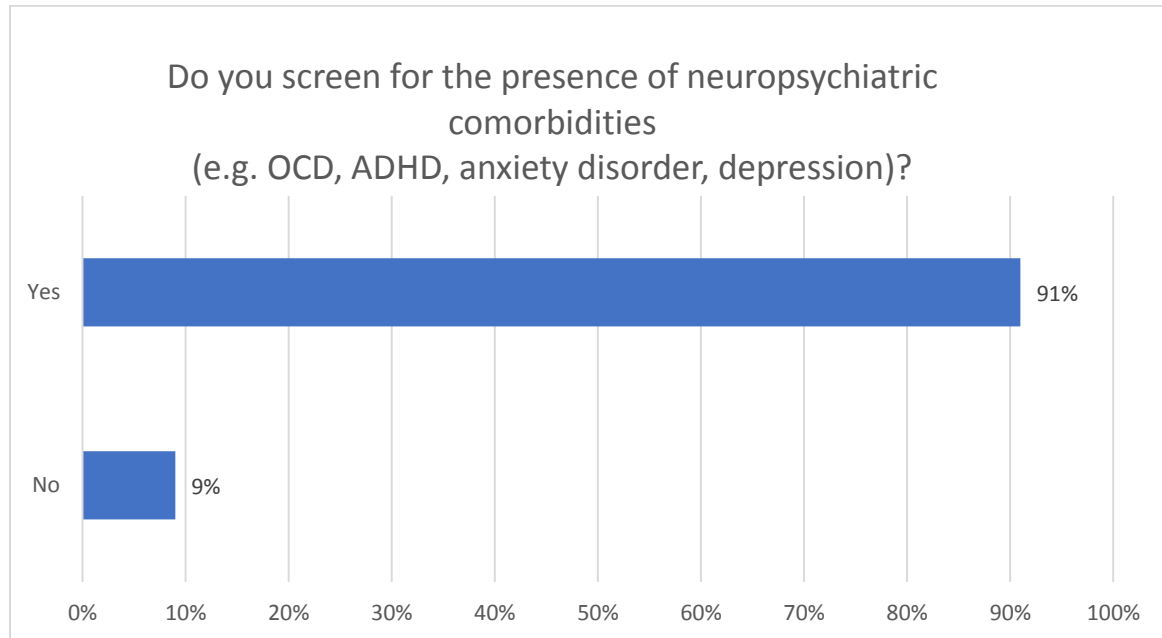

**Supplementary Figure 3.** Systematical screening of the presence of neuropsychiatric comorbidities in patients with tic disorders. Total number of respondents: n= 289.

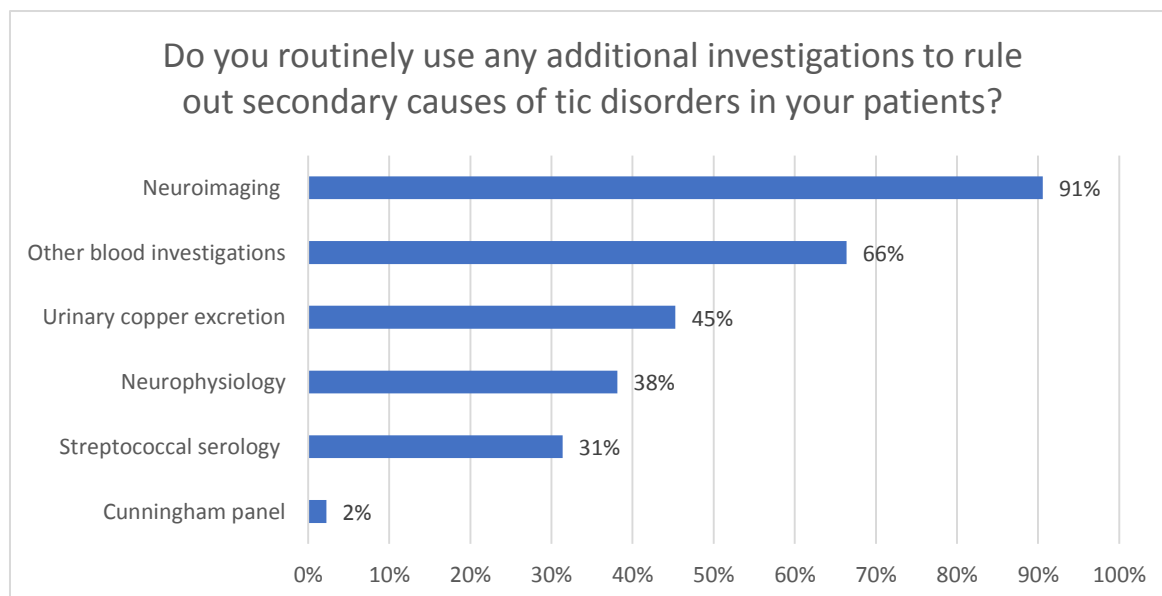

**Supplementary Figure 4.** Additional investigations for secondary tic disorders. Multiple choices per participant were possible. Total number of respondents: n= 223.

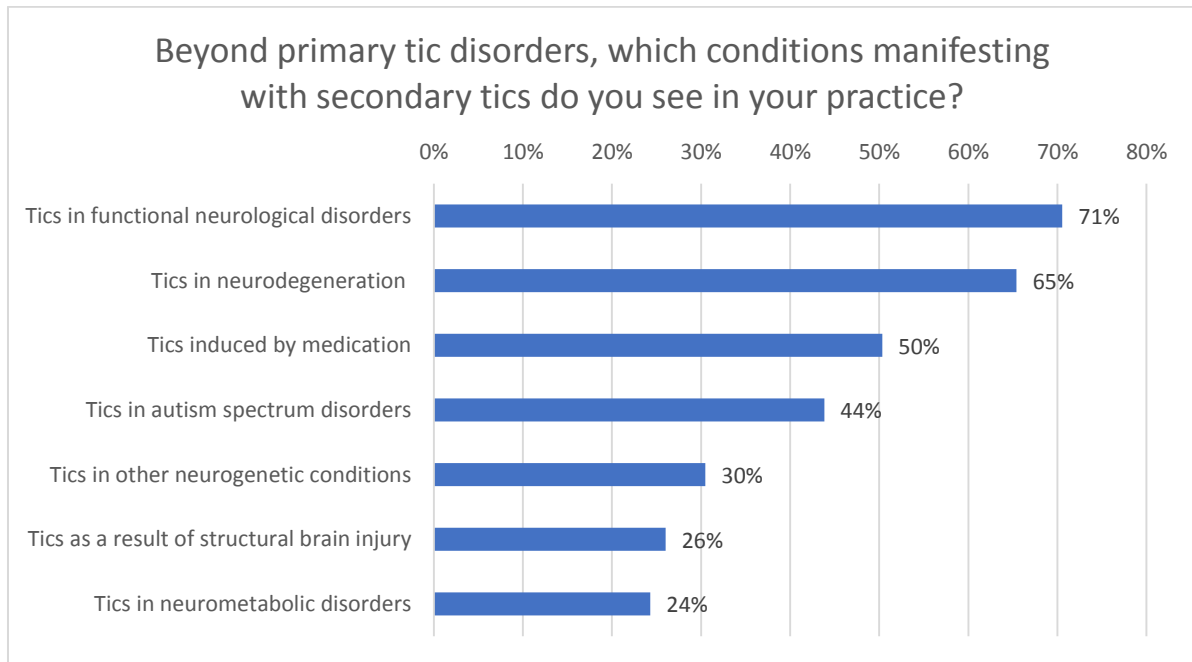

**Supplementary Figure 5.** List of tic etiologies beyond primary disorders. Multiple choices per participant were possible. Total number of respondents: n= 292.

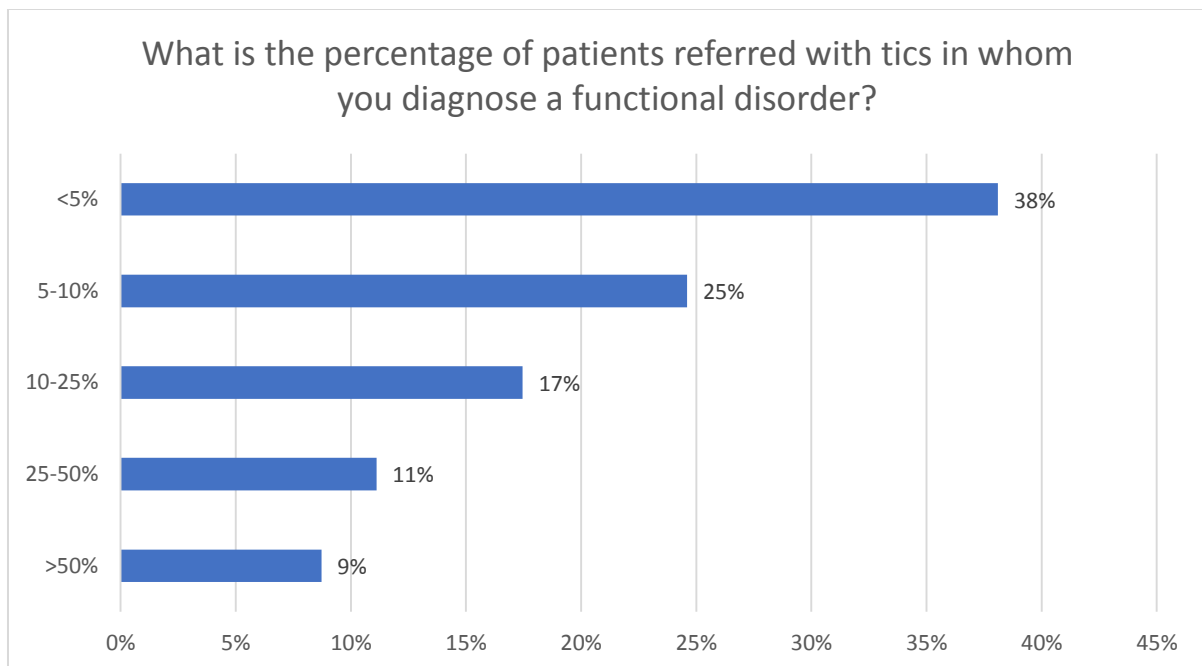

**Supplementary Figure 6.** Percentage of referred patients presenting with tic-like behaviors subsequently diagnosed with a functional tic-like disorder. Total number of respondents: n= 252.

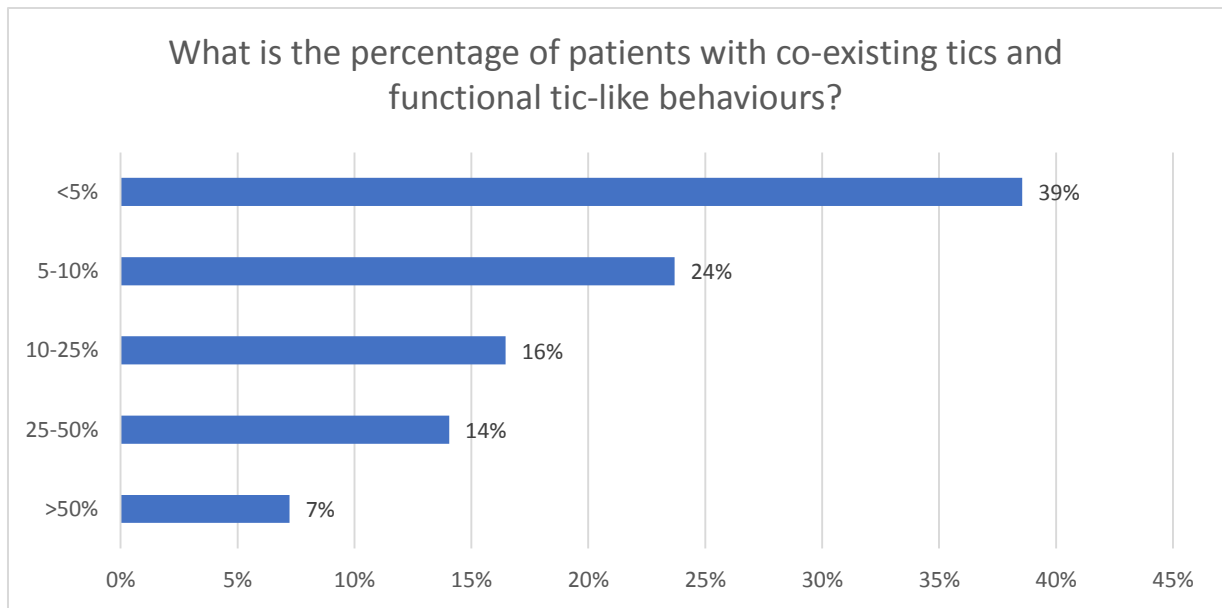

**Supplementary Figure 7.** Percentage of all patients with tic disorders with functional overlay. Total number of respondents: n= 249.

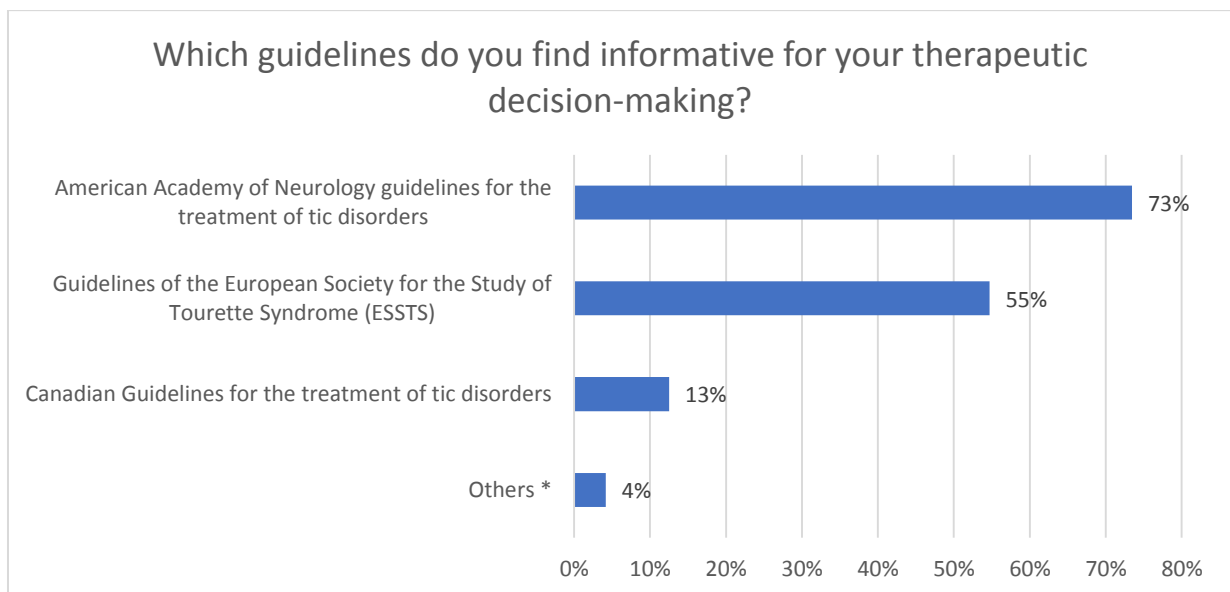

**Supplementary Figure 8.** Guidelines that were found informative for therapeutic decision-making. Total number of respondents: n= 192.

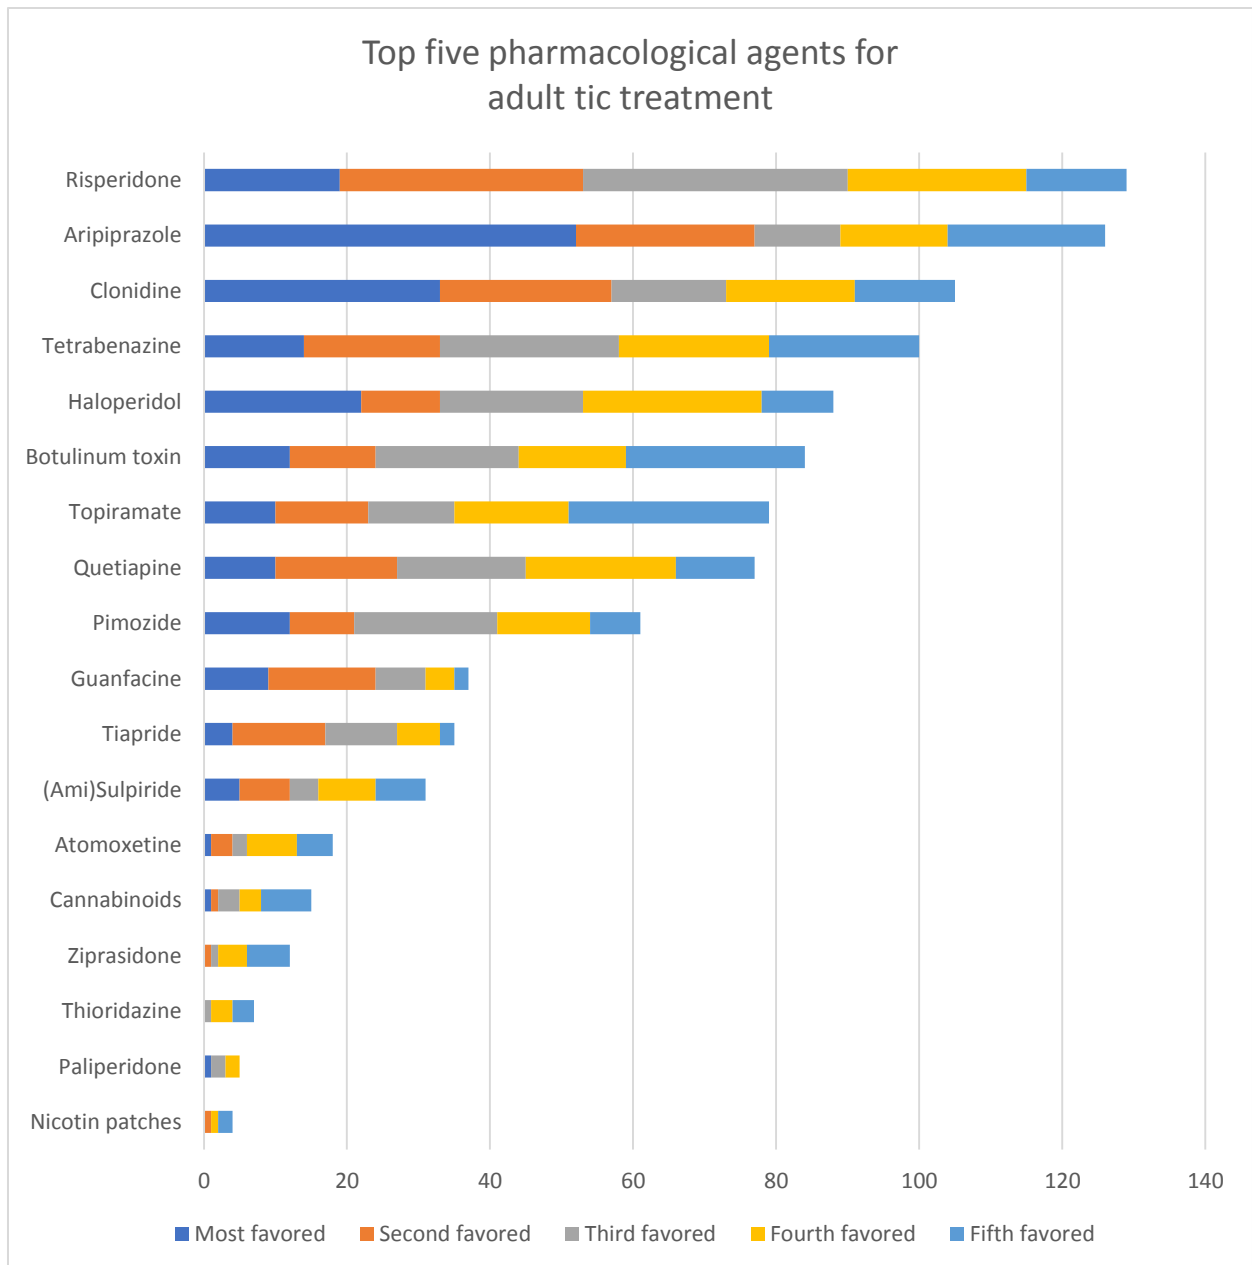

**Supplementary Figure 9.** Preferred top five pharmacological agents used for treating tics in adults. Total number of respondents: n= 220.



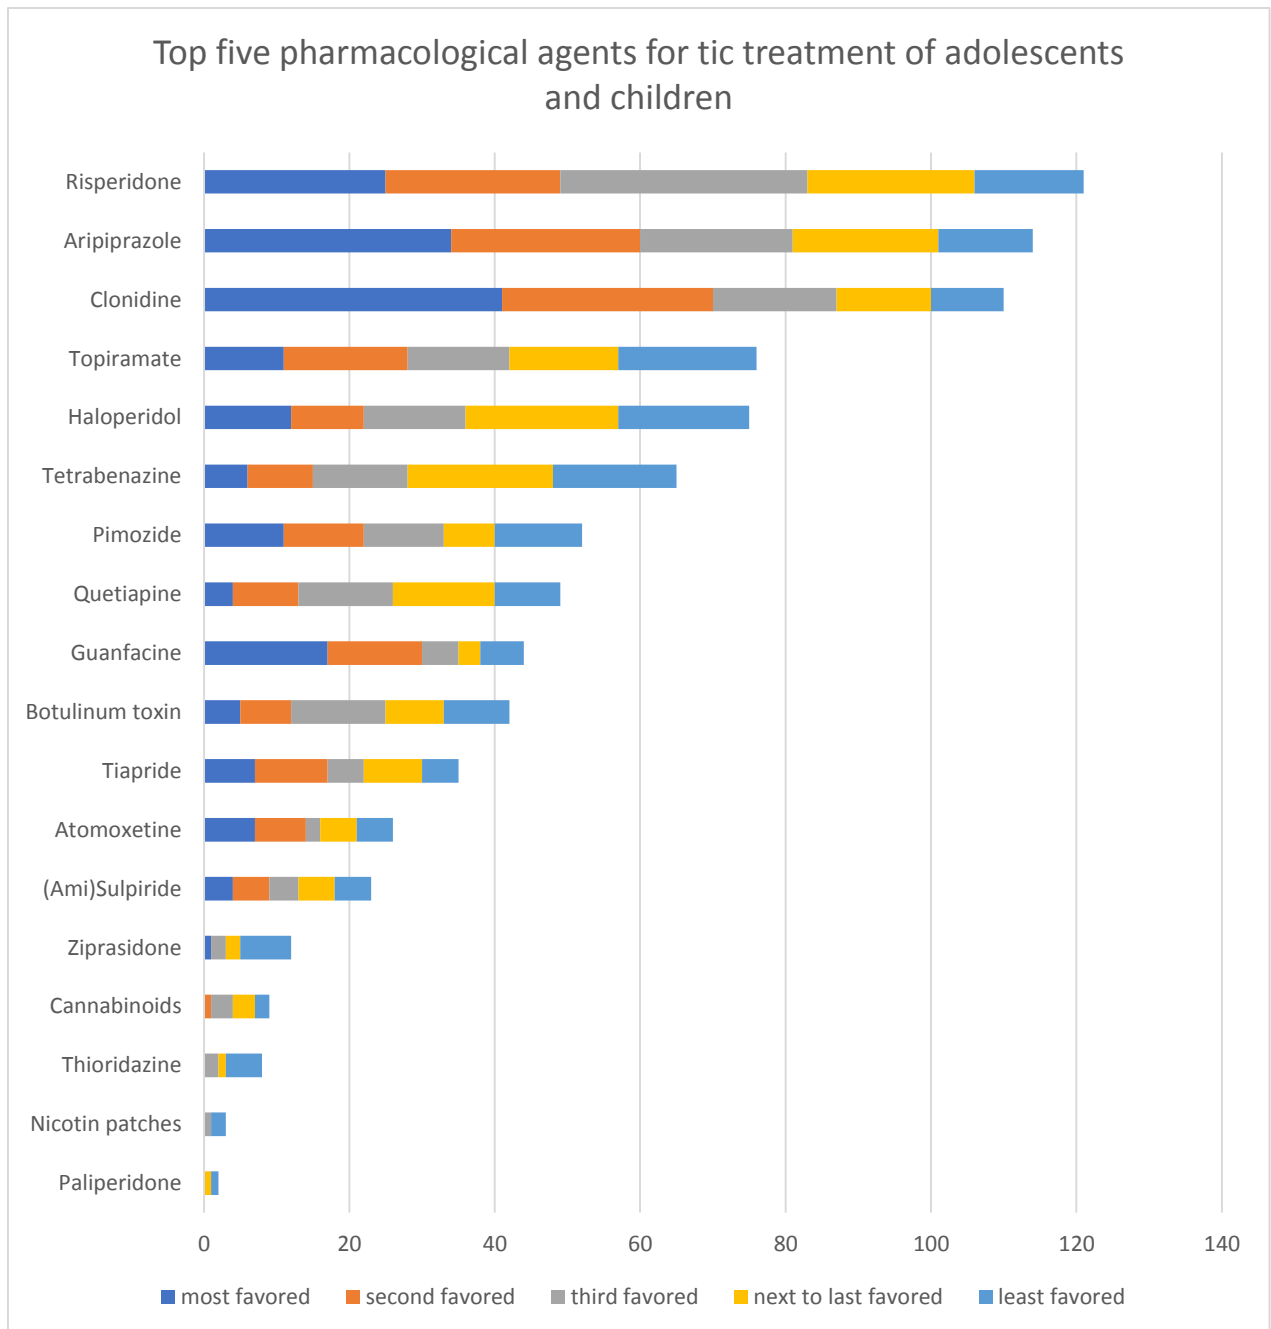

**Supplementary Figure 10.** The top five pharmacological agents used for treating tics in adolescents and children. Total number of respondents: n= 197.

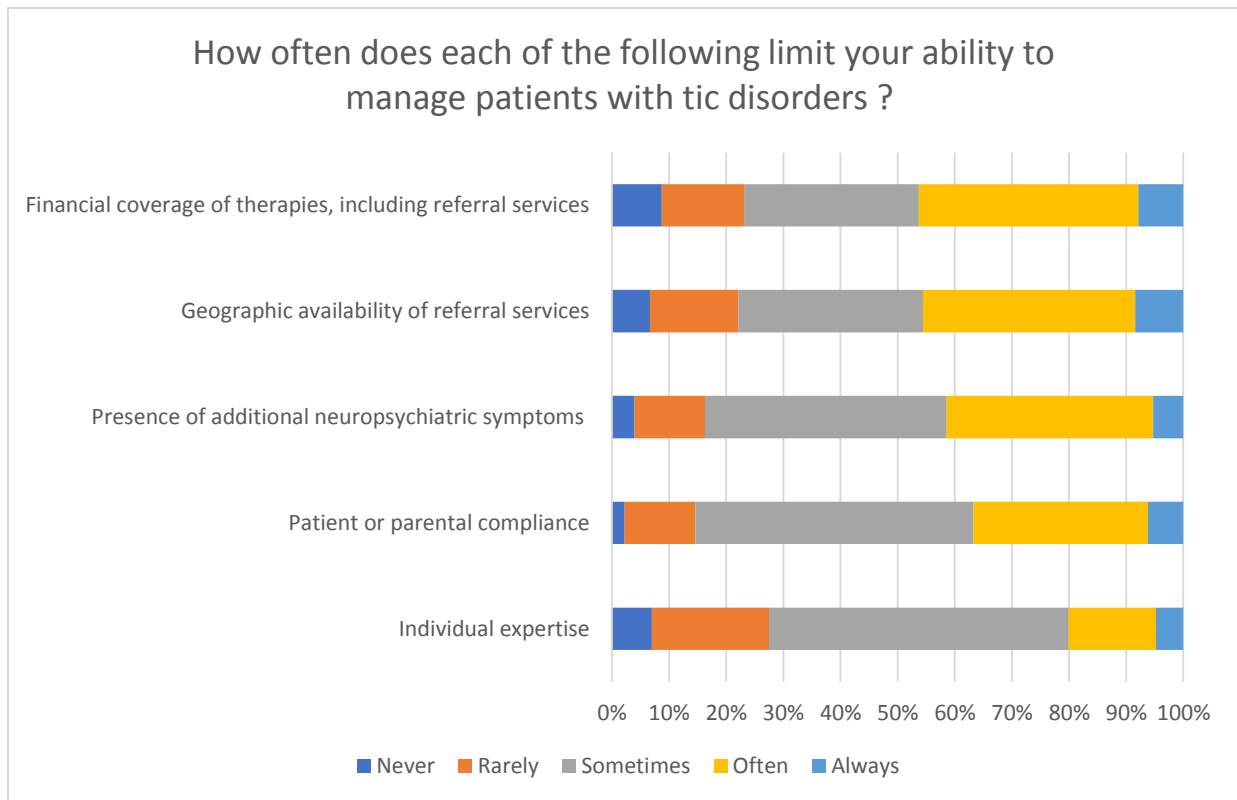

**Supplementary Figure 11.** Limiting factors to treatment success. Number of respondents: n= 231.

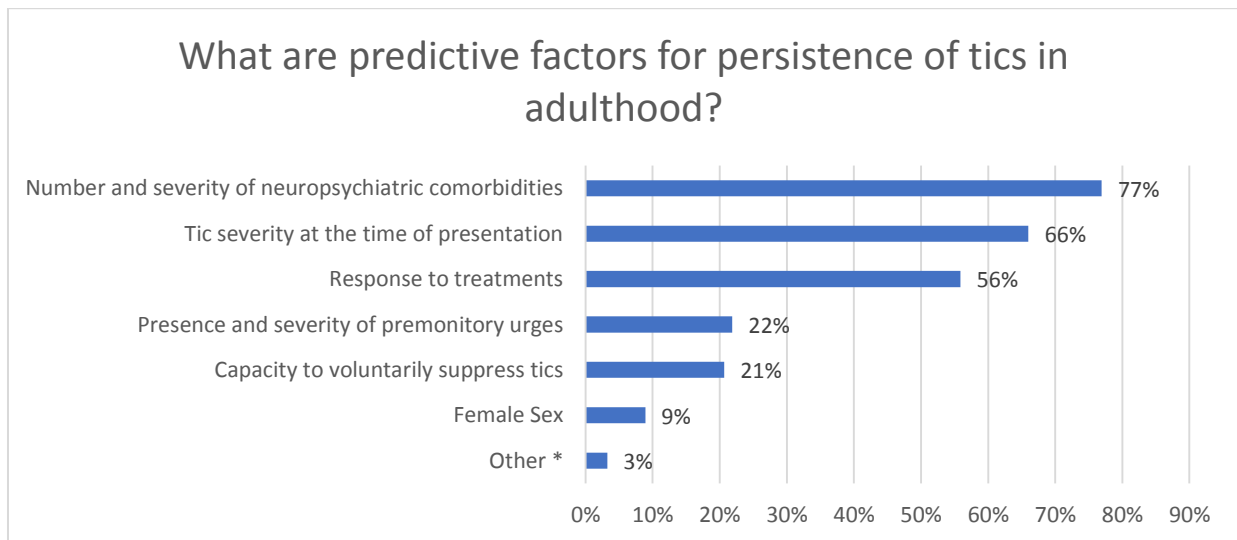

**Supplementary Figure 12.** Predictive factors suggested to influence prognosis of tic disorders. Multiple choices per participant were possible. Total number of respondents: n= 247.
